# Supplementary material
Source: PubMed Central journal article supplement (PMC534633)
Supplement: nar_32_20_6144__1.pdf [file nar_32_20_6144__1.pdf]

## RNA

ar0001 2.30  
ar0002 2.50  
ar0004 2.50  
ar0006 1.90  
ar0008 2.10  
ar0009 1.16  
ar0010 1.40  
ar0011 2.50  
ar0012 1.60  
ar0013 1.16  
ar0014 1.23  
ar0019 0.97  
ar0020 1.20  
ar0022 1.90  
ar0023 1.60  
ar0025 2.10  
ar0028 2.10  
ar0029 1.70  
ar0032 2.18  
ar0033 1.80  
ar0034 1.40  
arh064 1.80  
arh074 1.46  
arl048 1.80  
arl062 2.60  
arn035 2.25  
ur0001 2.70  
ur0005 2.30  
ur0025 2.50  
url029 2.64  
url050 2.40  
url064 1.50  
urx063 2.40

## DNA

bd0001 1.60  
bd0002 2.70  
bd0003 2.80  
bd0004 3.0  
bd0005 1.75  
bd0006 1.15  
bd0007 1.1  
bd0008 1.43  
bd0009 1.6  
bd0010 2.0  
bd0011 2.3  
bd0015 2.5  
bd0019 1.70

bd0022 2.6  
bd0023 0.74  
bd0024 1.20  
bd0025 1.50  
bd0027 1.60  
bd0028 2.50  
bd0029 1.82  
bd0031 1.60  
bdj008 1.30  
bdj017 1.60  
bdj019 1.40  
bdj025 1.50  
bdj031 1.50  
bdj036 1.70  
bdj037 2.00  
bdj039 2.20  
bdj051 2.00  
bdj052 1.90  
bdjb44 1.30  
bdjb48 2.00  
bdjb49 1.70  
bdjb50 1.70  
bdjb57 1.60  
bdjb77 2.50  
bdl084 1.40  
bdlb03 3.00  
bdlb04 2.30  
bdlb10 2.50  
bdlb13 2.00  
bdlb26 2.00  
bdlb33 2.80  
bdlb04 2.30  
bdlb40 2.40  
bdlb53 2.90  
bdlb54 2.250  
bdlb56 2.50  
bdlb58 2.250  
bdlb72 2.01  
bdlb73 2.03  
bdlb74 2.01  
bdlb76 2.50  
bdlb82 2.50  
bdlb83 2.70  
bdlb84 1.55  
bdlb85 1.55  
bdls67 2.40  
bdls79 2.50  
bdls80 2.14  
dd0020 2.27  
udj031 2.50

udj048 2.60  
udj049 2.00  
udj060 2.60

**Table S1.** NDB code of the structures of RNA and DNA used in this study. The resolution of the crystal is indicated.

## B-DNA

| Step  | N   | Shift      | Slide      | Rise      | Tilt    | Roll    | Twist |
|-------|-----|------------|------------|-----------|---------|---------|-------|
| AA    | 55  | -0.06(0.3) | -0.16(0.4) | 3.28(0.1) | 0.1(2)  | 1.4(5)  | 35(4) |
| AC    | 18  | 0.06(0.6)  | -0.43(0.3) | 3.23(0.2) | -0.3(2) | 1.4(4)  | 32(2) |
| AG    | 10  | 0.06(0.4)  | 0.34(0.4)  | 3.27(0.1) | 0.2(3)  | 5.5(4)  | 28(6) |
| AT    | 44  | 0.12(0.3)  | -0.57(0.2) | 3.30(0.1) | 0.3(3)  | -1.2(3) | 31(4) |
| CA    | 32  | 0.02(0.3)  | 1.88(1.0)  | 3.32(0.2) | 0.0(3)  | -1.2(6) | 43(9) |
| CC    | 21  | 0.05(0.6)  | 0.28(0.3)  | 3.40(0.2) | -0.1(3) | 3.9(4)  | 35(4) |
| CG    | 64  | 0.06(0.5)  | 0.68(0.3)  | 3.25(0.2) | 0.0(3)  | 6.2(3)  | 31(6) |
| GA    | 47  | 0.00(0.5)  | -0.01(0.4) | 3.43(0.1) | 0.0(3)  | 0.4(4)  | 41(4) |
| GC    | 67  | -0.30(0.8) | 0.31(0.4)  | 3.57(0.2) | 0.0(5)  | -6.8(5) | 40(4) |
| TA    | 9   | -0.17(0.3) | 0.38(0.7)  | 3.37(0.2) | -1.4(2) | -0.6(4) | 43(5) |
| Total | 367 | -0.03(0.6) | 0.26(0.8)  | 3.36(0.2) | 0.0(3)  | 0.3(6)  | 36(7) |

## A-RNA

| Step  | N   | Shift      | Slide      | Rise      | Tilt    | Roll    | Twist |
|-------|-----|------------|------------|-----------|---------|---------|-------|
| AA    | 9   | -0.08(0.3) | -1.27(0.4) | 3.18(0.2) | -0.8(2) | 7.0(3)  | 31(5) |
| AC    | 17  | 0.23(0.5)  | -1.43(0.3) | 3.24(0.2) | 0.8(4)  | 4.8(3)  | 32(3) |
| AG    | 30  | -0.04(0.5) | -1.50(0.3) | 3.30(0.1) | 0.5(2)  | 8.5(3)  | 30(2) |
| AU    | 8   | -0.06(0.3) | -1.36(0.3) | 3.24(0.2) | 1.1(2)  | 7.1(4)  | 33(4) |
| CA    | 25  | 0.11(0.5)  | -1.46(0.2) | 3.09(0.2) | 1.0(2)  | 9.9(3)  | 31(3) |
| CC    | 41  | -0.01(0.5) | -1.78(0.3) | 3.32(0.2) | 0.3(4)  | 8.7(4)  | 32(3) |
| CG    | 18  | 0.30(0.4)  | -1.89(0.4) | 3.30(0.3) | -0.1(2) | 12.1(6) | 27(4) |
| GA    | 13  | 0.07(0.5)  | -1.70(0.5) | 3.38(0.3) | 1.3(4)  | 9.4(4)  | 32(4) |
| GC    | 28  | 0.07(0.6)  | -1.39(0.2) | 3.22(0.1) | 0.0(3)  | 6.1(3)  | 35(4) |
| UA    | 30  | -0.02(0.4) | -1.45(0.2) | 3.26(0.2) | -0.2(3) | 10.7(3) | 32(4) |
| Total | 209 | 0.05(0.5)  | -1.56(0.3) | 3.26(0.2) | 0.4(3)  | 8.6(4)  | 32(4) |

**Table S2.** Mean helical parameters (standard deviations in parenthesis) for the 10 different B-DNA and A-RNA steps in the database. Translational and rotational parameters are in Å and degrees. Total values correspond to the averages determined for all the structures in the database.
